# Supplementary material for: Similarities and differences in the nutritional composition of nuts and seeds in Serbia
Source: PubMed Central journal article supplement (PMC9523690; doi:10.3389/fnut.2022.1003125), 2022-09-16
Supplement: Data_Sheet_1.pdf [file Data_Sheet_1.pdf]

Table S1. Total fats and fatty acids content in analyzed samples (g 100 g<sup>-1</sup>)

| Sample                 | Total fat  | Saturated fatty acids* | Palmitoleic acid | Oleic acid | 11-eicosenoic acid | Linoleic acid | Alpha-linolenic acid |
|------------------------|------------|------------------------|------------------|------------|--------------------|---------------|----------------------|
| Peanut raw             | 49.2±0.7   | 6.8±0.6                | <0.05            | 23.8±0.7   | 0.66±0.06          | 15.6±0.9      | <0.05                |
| Peanuts roasted        | 52.5±0.6   | 8.7±0.5                | <0.05            | 25.2±0.8   | 0.61±0.07          | 15.1±1.0      | <0.05                |
| Peanuts boiled         | 50.1±0.6   | 6.9±0.4                | <0.05            | 23.9±0.6   | 0.60±0.07          | 15.8±0.8      | <0.05                |
| Almond raw             | 49.4±0.3   | 3.7±0.2                | 0.24±0.02        | 30.6±0.7   | <0.05              | 12.1±0.6      | <0.05                |
| Almond roasted         | 55.2±0.3   | 4.2±0.3                | 0.22±0.03        | 34.6±0.5   | <0.05              | 13.5±0.7      | <0.05                |
| Almond boiled          | 50.6±0.2   | 3.9±0.3                | 0.21±0.03        | 32.0±0.4   | <0.05              | 12.1±0.5      | <0.05                |
| Hazelnuts raw          | 60.7±0.4   | 4.5±0.2                | 0.12±0.02        | 45.4±0.6   | 0.13±0.03          | 7.8±0.6       | 0.09±0.02            |
| Hazelnuts roasted      | 62.4±0.8   | 4.5±0.4                | 0.12±0.02        | 46.4±0.5   | 0.13±0.03          | 8.4±0.4       | 0.06±0.02            |
| Walnut                 | 59.0±0.6   | 3.4±0.3                | 0.06±0.01        | 14.5±0.3   | 0.41±0.04          | 33.1±0.7      | 2.01±0.04            |
| Brazil nut             | 66.4±0.4   | 15.1±0.4               | 0.23±0.03        | 24.2±0.4   | 0.05±0.02          | 20.5±0.4      | <0.05                |
| Cashew nut raw         | 43.8±0.9   | 7.8±0.4                | 0.14±0.02        | 23.5±0.3   | 0.14±0.03          | 7.8±0.6       | 0.06±0.02            |
| Cashew nut roasted     | 47.8±0.7   | 8.5±0.3                | 0.15±0.02        | 25.6±0.3   | 0.15±0.03          | 8.5±0.5       | 0.07±0.02            |
| Pecan nut              | 72.0±0.4   | 6.2±0.2                | <0.05            | 40.6±0.4   | 0.21±0.03          | 20.6±0.9      | 0.99±0.04            |
| Pine nuts              | 68.4±0.3   | 4.9±0.3                | <0.05            | 17.9±0.4   | 0.80±0.04          | 33.1±1.0      | 0.11±0.03            |
| Pistachios roasted     | 44.4±0.5   | 5.4±0.4                | 0.46±0.04        | 22.7±0.4   | 0.17±0.03          | 13.2±0.8      | 0.25±0.03            |
| Sunflower seed raw     | 51.5±0.4   | 4.5±0.3                | <0.05            | 18.4±0.3   | 0.09±0.02          | 23.0±0.8      | 0.07±0.02            |
| Sunflower seed roasted | 51.3±0.5   | 7.1±0.4                | 0.06±0.01        | 7.9±0.5    | 0.08±0.01          | 34.2±0.6      | 0.08±0.02            |
| Pumpkin seed raw       | 45.8±0.8   | 8.7±0.3                | 0.10±0.01        | 14.1±0.4   | 0.10±0.02          | 20.7±0.8      | 0.18±0.03            |
| Pumpkin seed roasted   | 42.1±0.6   | 8.0±0.4                | 0.09±0.02        | 13.0±0.4   | 0.10±0.01          | 19.0±0.7      | 0.17±0.02            |
| Chia seed              | 30.8±0.7   | 3.2±0.2                | <0.05            | 2.0±0.1    | 0.05±0.01          | 5.8±0.6       | 17.6±0.1             |
| Flax seed              | 42.2±0.4   | 3.7±0.2                | 0.20±0.02        | 7.1±0.3    | 0.10±0.02          | 7.7±0.4       | 23.2±0.9             |
| Hemp seed              | 48.8±0.5   | 4.6±0.3                | 0.30±0.03        | 5.3±0.2    | 0.12±0.02          | 27.5±0.7      | 8.7±0.8              |
| Sesame seed            | 49.7±0.4   | 7.0±0.4                | 0.15±0.03        | 18.5±0.3   | 0.07±0.02          | 21.4±1.1      | 0.38±0.04            |
| Black sesame seed      | 64.0±0.5   | 8.9±0.4                | 0.20±0.03        | 25.9±0.4   | 0.20±0.03          | 27.6±0.9      | 0.50±0.04            |
| <b>Nuts/seeds**</b>    | <b>1.2</b> | <b>1.0</b>             | <b>1.06</b>      | <b>2.3</b> | <b>2.72</b>        | <b>0.8</b>    | <b>0.04</b>          |

\*expressed as a sum of of myristic, palmitic, stearic and arachidic acid; \*\*the ratio of the average value of specific nut parameters to the average value of specific seed parameters



|             |     |     |     |     |     |     |     |     |     |
|-------------|-----|-----|-----|-----|-----|-----|-----|-----|-----|
| Nuts/seeds* | 1.5 | 0.3 | 0.4 | 0.6 | 0.8 | 0.2 | 0.1 | 0.3 | 0.6 |
|-------------|-----|-----|-----|-----|-----|-----|-----|-----|-----|

LOQ, limit of quantification; \*the ratio of the average value of specific nut parameters to the average value of specific seed parameters

Table S3a. The essential amino acids content in analyzed samples, reported as g 100 g<sup>-1</sup>

| Samples                | Lys         | Thr         | Val         | Ile         | Leu         | Met         | His         | Phe         |
|------------------------|-------------|-------------|-------------|-------------|-------------|-------------|-------------|-------------|
| Peanut raw             | 1.08± 0.216 | 0.87± 0.174 | 1.07± 0.214 | 1.25± 0.250 | 1.97± 0.394 | 0.4± 0.08   | 0.71± 0.142 | 1.36± 0.272 |
| Peanuts roasted        | 0.65± 0.130 | 0.75± 0.150 | 0.66± 0.132 | 2.42± 0.484 | 2.15± 0.430 | 0.75± 0.150 | 0.53± 0.106 | 1.04± 0.208 |
| Peanuts boiled         | 1.04± 0.208 | 0.98± 0.196 | 1.05± 0.210 | 0.97± 0.194 | 1.7± 0.34   | 0.19± 0.038 | 0.81± 0.162 | 1.46± 0.292 |
| Peanuts marinated      | 1.04± 0.152 | 0.65± 0.110 | 0.96± 0.174 | 1.02± 0.182 | 1.65± 0.276 | 0.19± 0.028 | 0.71± 0.116 | 1.41± 0.236 |
| Almond raw             | 0.76± 0.14  | 0.55± 0.106 | 0.87± 0.164 | 0.91± 0.144 | 1.38± 0.298 | 0.14± 0.030 | 0.58± 0.136 | 1.18± 0.258 |
| Almond roasted         | 0.70± 0.154 | 0.53± 0.182 | 0.82± 0.194 | 0.72± 0.162 | 1.49± 0.474 | 0.15± 0.066 | 0.68± 0.132 | 1.29± 0.256 |
| Almond boiled          | 0.77± 0.106 | 0.91± 0.102 | 0.97± 0.146 | 0.81± 0.124 | 2.37± 0.222 | 0.33± 0.032 | 0.66± 0.10  | 1.28± 0.148 |
| Hazelnuts raw          | 0.53± 0.112 | 0.51± 0.122 | 0.73± 0.150 | 0.62± 0.132 | 1.11± 0.238 | 0.16± 0.042 | 0.5± 0.110  | 0.74± 0.182 |
| Hazelnuts roasted      | 0.56± 0.124 | 0.61± 0.124 | 0.75± 0.148 | 0.66± 0.136 | 1.19± 0.238 | 0.21± 0.04  | 0.55± 0.112 | 0.91± 0.170 |
| Walnut                 | 0.62± 0.082 | 0.62± 0.106 | 0.74± 0.094 | 0.68± 0.182 | 1.19± 0.228 | 0.2± 0.138  | 0.56± 0.074 | 0.85± 0.092 |
| Brazil nut             | 0.41± 0.22  | 0.53± 0.148 | 0.47± 0.222 | 0.91± 0.264 | 1.14± 0.290 | 0.69± 0.054 | 0.37± 0.12  | 0.46± 0.194 |
| Cashew nut raw         | 1.10± 0.212 | 0.74± 0.192 | 1.11± 0.194 | 1.32± 0.272 | 1.45± 0.336 | 0.27± 0.088 | 0.6± 0.108  | 0.97± 0.176 |
| Cashew nut roasted     | 1.06± 0.070 | 0.96± 0.054 | 0.97± 0.072 | 1.36± 0.108 | 1.68± 0.132 | 0.44± 0.028 | 0.54± 0.066 | 0.88± 0.088 |
| Pecan nut              | 0.35± 0.138 | 0.27± 0.112 | 0.36± 0.128 | 0.54± 0.130 | 0.66± 0.222 | 0.14± 0.06  | 0.33± 0.088 | 0.44± 0.112 |
| Pine nuts              | 0.69± 0.226 | 0.56± 0.172 | 0.64± 0.2   | 0.65± 0.296 | 1.11± 0.352 | 0.3± 0.090  | 0.44± 0.10  | 0.56± 0.184 |
| Pistachios roasted     | 1.13± 0.18  | 0.86± 0.244 | 1± 0.256    | 1.48± 0.218 | 1.76± 0.398 | 0.45± 0.144 | 0.5± 0.196  | 0.92± 0.270 |
| Sunflower seed raw     | 0.94± 0.134 | 0.86± 0.144 | 0.99± 0.168 | 0.88± 0.244 | 1.33± 0.274 | 0.43± 0.090 | 0.8± 0.134  | 0.98± 0.166 |
| Sunflower seed roasted | 0.67± 0.230 | 0.72± 0.212 | 0.84± 0.28  | 1.22± 0.510 | 1.37± 0.64  | 0.45± 0.178 | 0.67± 0.188 | 0.83± 0.302 |
| Pumpkin seed raw       | 1.15± 0.294 | 1.06± 0.246 | 1.4± 0.386  | 2.55± 0.330 | 3.2± 0.596  | 0.89± 0.152 | 0.94± 0.222 | 1.51± 0.416 |
| Pumpkin seed roasted   | 1.47± 0.230 | 1.23± 0.212 | 1.93± 0.152 | 1.65± 0.122 | 2.98± 0.212 | 0.76± 0.10  | 1.11± 0.134 | 2.08± 0.188 |
| Chia seed              | 1.15± 0.194 | 1.06± 0.174 | 0.76± 0.2   | 0.61± 0.224 | 1.06± 0.270 | 0.5± 0.088  | 0.67± 0.112 | 0.94± 0.182 |
| Flax seed              | 0.97± 0.328 | 0.87± 0.224 | 1± 0.378    | 1.12± 0.298 | 1.35± 0.392 | 0.44± 0.202 | 0.56± 0.212 | 0.91± 0.406 |
| Hemp seed              | 1.64± 0.168 | 1.12± 0.156 | 1.89± 0.204 | 1.49± 0.164 | 1.96± 0.226 | 1.01± 0.134 | 1.06± 0.122 | 2.03± 0.238 |

|                   |             |             |             |             |             |             |             |             |
|-------------------|-------------|-------------|-------------|-------------|-------------|-------------|-------------|-------------|
| Sesame seed       | 0.90± 0.188 | 1.22± 0.172 | 1.28± 0.198 | 1.09± 0.176 | 1.99± 0.266 | 0.72± 0.086 | 0.98± 0.16  | 1.35± 0.196 |
| Black sesame seed | 0.84± 0.168 | 0.78± 0.214 | 1.02± 0.156 | 0.82± 0.152 | 1.13± 0.204 | 0.67± 0.224 | 0.61± 0.148 | 1.19± 0.164 |
| Nuts/seeds*       | 0.71        | 0.69        | 0.66        | 0.80        | 0.82        | 0.49        | 0.68        | 0.73        |

Lys, lysin; Thr, threonin; Val, valine; Ile, isoleucine; Leu, leucine; Met, methionine; His, histidine; Phe, phenylalanine;

\*the ratio of the average value of specific nut parameters to the average value of specific seed parameters.

Table S3b. The non-essential amino acids content in analyzed samples, reported as g 100 g<sup>-1</sup>

| Samples                | Ser         | Pro         | Gly         | Ala         | Glu         | Asp         | Cys         | Tyr         | Arg         |
|------------------------|-------------|-------------|-------------|-------------|-------------|-------------|-------------|-------------|-------------|
| Peanut raw             | 1.68± 0.336 | 1.84± 0.368 | 1.91± 0.382 | 1.29± 0.258 | 5.48± 1.096 | 3.34± 0.668 | 0.45± 0.090 | 0.7± 0.14   | 3.08± 0.616 |
| Peanuts roasted        | 1.06± 0.212 | 1.21± 0.242 | 1.49± 0.298 | 1.17± 0.234 | 6.25± 1.250 | 3.39± 0.678 | 0.27± 0.054 | 0.77± 0.154 | 2.64± 0.528 |
| Peanuts boiled         | 1.28± 0.256 | 1.07± 0.214 | 2.00± 0.4   | 1.5± 0.30   | 6.02± 1.204 | 3.73± 0.746 | 0.35± 0.070 | 0.75± 0.150 | 3.76± 0.752 |
| Peanuts marinated      | 1.21± 0.16  | 1.03± 0.162 | 1.53± 0.26  | 1.16± 0.210 | 6.33± 1.282 | 3.81± 0.518 | 0.29± 0.058 | 0.68± 0.088 | 3.42± 0.682 |
| Almond raw             | 0.8± 0.198  | 0.81± 0.178 | 1.3± 0.302  | 1.05± 0.218 | 6.41± 1.464 | 2.59± 0.546 | 0.29± 0.066 | 0.44± 0.10  | 3.41± 0.702 |
| Almond roasted         | 0.99± 0.170 | 0.89± 0.208 | 1.51± 0.378 | 1.09± 0.276 | 7.32± 1.148 | 2.73± 0.496 | 0.33± 0.06  | 0.5± 0.098  | 3.51± 0.762 |
| Almond boiled          | 0.85± 0.142 | 1.04± 0.12  | 1.89± 0.144 | 1.38± 0.156 | 5.74± 0.666 | 2.48± 0.318 | 0.3± 0.058  | 0.49± 0.070 | 3.81± 0.536 |
| Hazelnuts raw          | 0.71± 0.182 | 0.6± 0.138  | 0.72± 0.162 | 0.78± 0.178 | 3.33± 0.724 | 1.59± 0.336 | 0.29± 0.062 | 0.35± 0.066 | 2.68± 0.464 |
| Hazelnuts roasted      | 0.91± 0.196 | 0.69± 0.142 | 0.81± 0.178 | 0.89± 0.166 | 3.62± 0.666 | 1.68± 0.346 | 0.31± 0.058 | 0.33± 0.090 | 2.32± 0.546 |
| Walnut                 | 0.98± 0.098 | 0.71± 0.096 | 0.89± 0.176 | 0.83± 0.190 | 3.33± 0.68  | 1.73± 0.330 | 0.29± 0.058 | 0.45± 0.062 | 2.73± 0.416 |
| Brazil nut             | 0.49± 0.206 | 0.48± 0.154 | 0.88± 0.176 | 0.95± 0.18  | 3.4± 0.870  | 1.65± 0.358 | 0.29± 0.076 | 0.31± 0.078 | 2.08± 0.484 |
| Cashew nut raw         | 1.03± 0.206 | 0.77± 0.170 | 0.88± 0.242 | 0.9± 0.250  | 4.35± 0.828 | 1.79± 0.368 | 0.38± 0.070 | 0.39± 0.076 | 2.42± 0.484 |
| Cashew nut roasted     | 1.03± 0.082 | 0.85± 0.068 | 1.21± 0.084 | 1.25± 0.082 | 4.14± 0.610 | 1.84± 0.304 | 0.35± 0.026 | 0.38± 0.056 | 2.42± 0.274 |
| Pecan nut              | 0.41± 0.154 | 0.34± 0.138 | 0.42± 0.146 | 0.41± 0.188 | 3.05± 0.730 | 1.52± 0.328 | 0.13± 0.054 | 0.28± 0.082 | 1.37± 0.436 |
| Pine nuts              | 0.77± 0.238 | 0.69± 0.212 | 0.73± 0.244 | 0.94± 0.262 | 3.65± 0.930 | 1.64± 0.402 | 0.27± 0.052 | 0.41± 0.068 | 2.18± 0.4   |
| Pistachios roasted     | 1.19± 0.248 | 1.06± 0.216 | 1.22± 0.210 | 1.31± 0.234 | 4.65± 1.064 | 2.01± 0.474 | 0.26± 0.130 | 0.34± 0.142 | 2± 0.506    |
| Sunflower seed raw     | 0.86± 0.14  | 0.89± 0.148 | 1.25± 0.214 | 1.18± 0.190 | 4.24± 0.862 | 1.89± 0.384 | 0.39± 0.184 | 0.48± 0.082 | 2.06± 0.454 |
| Sunflower seed roasted | 0.7± 0.288  | 0.74± 0.286 | 1.07± 0.354 | 0.95± 0.324 | 4.31± 1.234 | 1.92± 0.610 | 0.92± 0.070 | 0.41± 0.152 | 2.27± 0.552 |
| Pumpkin seed raw       | 1.44± 0.348 | 1.43± 0.286 | 1.77± 0.432 | 1.62± 0.358 | 6.17± 1.298 | 3.05± 0.670 | 0.35± 0.088 | 0.76± 0.198 | 2.76± 0.612 |
| Pumpkin seed roasted   | 1.74± 0.242 | 1.43± 0.164 | 2.16± 0.170 | 1.79± 0.232 | 6.49± 0.826 | 3.35± 0.394 | 0.44± 0.062 | 0.99± 0.092 | 3.06± 0.428 |
| Chia seed              | 1.21± 0.198 | 0.82± 0.168 | 0.85± 0.328 | 1.16± 0.262 | 4.13± 1.058 | 1.97± 0.490 | 0.31± 0.046 | 0.46± 0.08  | 2.14± 0.452 |

|                   |             |             |             |             |             |             |             |             |             |
|-------------------|-------------|-------------|-------------|-------------|-------------|-------------|-------------|-------------|-------------|
| Flax seed         | 0.99± 0.44  | 0.84± 0.286 | 1.64± 0.22  | 1.31± 0.270 | 5.29± 1.362 | 2.45± 0.782 | 0.23± 0.112 | 0.4± 0.206  | 2.23± 0.588 |
| Hemp seed         | 2.2± 0.224  | 1.43± 0.148 | 1.1± 0.152  | 1.35± 0.214 | 6.81± 0.832 | 3.91± 0.336 | 0.56± 0.08  | 1.03± 0.108 | 2.91± 0.490 |
| Sesame seed       | 1.24± 0.172 | 1.08± 0.178 | 1.05± 0.250 | 1.17± 0.236 | 5.32± 0.848 | 2.37± 0.378 | 0.65± 0.078 | 0.71± 0.096 | 2.53± 0.412 |
| Black sesame seed | 1.12± 0.226 | 0.74± 0.134 | 0.76± 0.122 | 1.07± 0.238 | 4.16± 0.832 | 1.68± 0.336 | 0.4± 0.08   | 0.54± 0.108 | 2.45± 0.490 |
| Nuts/Seeds*       | 0.74        | 0.83        | 0.92        | 0.81        | 0.90        | 0.90        | 0.64        | 0.72        | 1.08        |

Ser, serine; Pro, proline; Gly, glycine; Ala, alanine; Glu, glutamic acid; Asp, aspartic acid; Cys, cysteine; Tyr, tyrosine; Arg, arginine;

\*the ratio of the average value of specific nut parameters to the average value of specific seed parameters;

Table S4. Total proteins and total amino acids content in analyzed samples, reported as g 100 g<sup>-1</sup>

| Samples                | Total proteins | Total AAs | % EAAs | %NEAAs | EAAs/NEAAs* | %Basic AAs | % Aromatic AAs | % AcidicAAs | % Sulfur containing AAs | % Hydrophilic AAs | % Aliphatic AAs | Lys/Arg** |
|------------------------|----------------|-----------|--------|--------|-------------|------------|----------------|-------------|-------------------------|-------------------|-----------------|-----------|
| Peanut raw             | 29.23±0.16     | 28.48     | 30.58  | 69.42  | 0.44        | 17.10      | 7.23           | 8.82        | 2.98                    | 11.46             | 32.76           | 0.35      |
| Peanuts roasted        | 28.61±0.15     | 27.20     | 32.90  | 67.10  | 0.49        | 14.04      | 6.65           | 9.64        | 3.75                    | 15.81             | 33.46           | 0.25      |
| Peanuts boiled         | 29.58±0.13     | 28.66     | 28.61  | 71.39  | 0.40        | 19.57      | 7.71           | 9.75        | 1.88                    | 13.09             | 28.93           | 0.28      |
| Almond raw             | 24.35±0.18     | 23.47     | 27.14  | 72.86  | 0.37        | 20.24      | 6.90           | 9.00        | 1.83                    | 18.04             | 26.93           | 0.22      |
| Almond roasted         | 25.95±0.22     | 25.25     | 25.27  | 74.73  | 0.34        | 19.37      | 7.09           | 10.05       | 1.90                    | 17.07             | 25.82           | 0.20      |
| Almond boiled          | 26.77±0.62     | 26.08     | 31.06  | 68.94  | 0.45        | 20.09      | 6.79           | 8.22        | 2.42                    | 15.21             | 32.44           | 0.20      |
| Hazelnuts raw          | 16.92±0.15     | 15.95     | 30.72  | 69.28  | 0.44        | 23.26      | 6.83           | 4.92        | 2.82                    | 13.87             | 28.59           | 0.20      |
| Hazelnuts roasted      | 18.12±0.15     | 17.00     | 32.00  | 68.00  | 0.47        | 20.18      | 7.29           | 5.30        | 3.06                    | 11.92             | 29.35           | 0.24      |
| Walnut                 | 18.82±0.20     | 17.40     | 31.38  | 68.62  | 0.46        | 22.47      | 7.47           | 5.06        | 2.82                    | 11.76             | 28.97           | 0.23      |
| Brazil nut             | 16.28±0.24     | 15.51     | 32.11  | 67.89  | 0.47        | 18.44      | 4.96           | 5.05        | 6.32                    | 15.96             | 31.14           | 0.20      |
| Cashew nut raw         | 21.51±0.46     | 20.47     | 36.93  | 63.07  | 0.59        | 20.13      | 6.64           | 6.14        | 3.18                    | 12.15             | 31.41           | 0.45      |
| Cashew nut roasted     | 22.02±0.48     | 21.36     | 36.94  | 63.06  | 0.59        | 18.82      | 5.90           | 5.98        | 3.70                    | 11.07             | 34.27           | 0.44      |
| Pecan nut              | 11.69±0.39     | 11.02     | 28.04  | 71.96  | 0.39        | 18.60      | 6.53           | 4.57        | 2.45                    | 17.19             | 24.77           | 0.26      |
| Pine nuts              | 17.46±0.24     | 16.23     | 30.50  | 69.50  | 0.44        | 20.39      | 5.98           | 5.29        | 3.51                    | 13.13             | 29.33           | 0.32      |
| Pistachios roasted     | 23.02±0.37     | 22.14     | 36.59  | 63.41  | 0.58        | 16.40      | 5.69           | 6.66        | 3.21                    | 11.23             | 35.37           | 0.57      |
| Sunflower seed raw     | 21.12±0.29     | 20.45     | 35.26  | 64.74  | 0.54        | 18.58      | 7.14           | 6.13        | 4.01                    | 12.28             | 31.88           | 0.46      |
| Sunflower seed roasted | 20.51±0.34     | 20.06     | 33.75  | 66.25  | 0.51        | 18.00      | 6.18           | 6.23        | 6.83                    | 14.44             | 30.86           | 0.30      |
| Pumpkin seed raw       | 33.29±±0.43    | 32.05     | 39.63  | 60.37  | 0.66        | 15.13      | 7.08           | 9.22        | 3.87                    | 13.32             | 37.35           | 0.42      |
| Pumpkin seed roasted   | 35.82±0.28     | 34.66     | 38.11  | 61.89  | 0.62        | 16.27      | 8.86           | 9.84        | 3.46                    | 12.06             | 34.45           | 0.48      |

|                   |            |       |       |       |      |       |      |       |      |       |       |      |
|-------------------|------------|-------|-------|-------|------|-------|------|-------|------|-------|-------|------|
| Chia seed         | 20.52±0.31 | 19.80 | 34.09 | 65.91 | 0.52 | 20.00 | 7.07 | 6.10  | 4.09 | 9.04  | 26.57 | 0.54 |
| Flax seed         | 23.59±0.36 | 22.60 | 31.95 | 68.05 | 0.47 | 16.64 | 5.80 | 7.74  | 2.96 | 12.68 | 32.12 | 0.43 |
| Hemp seed         | 34.23±0.23 | 33.50 | 36.42 | 63.58 | 0.57 | 16.75 | 9.13 | 10.72 | 4.69 | 10.31 | 27.52 | 0.56 |
| Sesame seed       | 26.61±0.43 | 25.65 | 37.15 | 62.85 | 0.59 | 17.19 | 8.03 | 7.69  | 5.34 | 10.82 | 29.86 | 0.36 |
| Black sesame seed | 20.76±0.35 | 19.98 | 35.34 | 64.66 | 0.55 | 19.52 | 8.66 | 5.84  | 5.36 | 10.93 | 27.73 | 0.34 |

AAs, amino acids; EAAs, essential amino acids; NEAAs, non-essential amino acids; \*the ratio of essential amino acids to non-essential amino acids ; \*\* the ratio of lysine to arginine

Table S5. Macro and micro essential elements concentration in analyzed samples, reported as mg kg<sup>-1</sup>

| Sample                 | Na   | K    | Ca   | Mg   | P    | Fe    | Cu   | Zn   | Cr    | Mo    | Mn   |
|------------------------|------|------|------|------|------|-------|------|------|-------|-------|------|
| Peanut raw             | 45.6 | 3508 | 647  | 1706 | 4221 | 35.6  | 10.4 | 34.5 | 0.44  | 0.88  | 13.7 |
| Peanuts roasted        | 83.5 | 3771 | 726  | 1847 | 4587 | 37.9  | 9.9  | 36.7 | 0.37  | 1.93  | 14.4 |
| Peanuts boiled         | <25  | 3665 | 357  | 1556 | 3824 | 18.8  | 3.5  | 30.3 | 0.34  | 1.77  | 13.8 |
| Almond raw             | 8.4  | 3937 | 1995 | 2655 | 5191 | 107.0 | 10.7 | 31.6 | 2.17  | 0.25  | 20.6 |
| Almond roasted         | 21.1 | 4040 | 2301 | 2665 | 5324 | 79.2  | 9.6  | 32.3 | 1.89  | 0.46  | 20.7 |
| Almond boiled          | 10.5 | 3995 | 2251 | 2660 | 5280 | 85.0  | 10.1 | 32.0 | 1.99  | 0.29  | 20.6 |
| Hazelnuts raw          | <25  | 3812 | 1388 | 1467 | 3412 | 46.2  | 13.3 | 23.1 | 1.70  | <0.06 | 64.2 |
| Hazelnuts roasted      | <25  | 4024 | 1389 | 1514 | 3623 | 28.7  | 13.8 | 23.6 | <0.25 | <0.06 | 72.0 |
| Walnut                 | <25  | 3997 | 974  | 1867 | 5368 | 35.1  | 15.8 | 36.4 | 1.01  | <0.06 | 30.6 |
| Brazil nut             | <25  | 3760 | 1603 | 3724 | 7244 | 25.9  | 18.8 | 41.9 | <0.25 | <0.06 | 13.2 |
| Cashew nut raw         | 61.7 | 3807 | 376  | 2374 | 5261 | 51.4  | 19.8 | 51.5 | <0.25 | <0.06 | 18.0 |
| Cashew nut roasted     | 4412 | 3937 | 504  | 2501 | 5534 | 57.7  | 22.1 | 57.6 | <0.25 | <0.06 | 20.3 |
| Pecan nut              | <25  | 2295 | 532  | 1042 | 2814 | 26.0  | 7.5  | 37.6 | <0.25 | <0.06 | 35.5 |
| Pine nuts              | <25  | 3407 | 84.2 | 1936 | 4938 | 42.2  | 9.2  | 63.0 | <0.25 | <0.06 | 73.0 |
| Pistachios roasted     | 800  | 4414 | 989  | 981  | 4590 | 26.9  | 4.6  | 21.4 | 0.31  | <0.06 | 7.9  |
| Sunflower seed raw     | <25  | 3858 | 995  | 2813 | 7092 | 40.6  | 17.4 | 53.0 | <0.25 | 0.38  | 21.3 |
| Sunflower seed roasted | 2550 | 2708 | 552  | 1839 | 4558 | 24.7  | 10.0 | 34.6 | <0.25 | 0.26  | 15.1 |
| Pumpkin seed raw       | 91.3 | 4083 | 574  | 4253 | 9290 | 70.0  | 9.0  | 33.1 | <0.25 | 1.46  | 29.3 |
| Pumpkin seed roasted   | 3310 | 4363 | 600  | 4344 | 9981 | 73.9  | 10.2 | 45.3 | 0.30  | 1.52  | 32.1 |
| Chia seed              | <25  | 4478 | 5836 | 3409 | 9234 | 62.1  | 14.2 | 52.5 | 0.32  | 0.58  | 41.2 |

|                   |     |      |      |      |      |       |      |      |       |       |      |
|-------------------|-----|------|------|------|------|-------|------|------|-------|-------|------|
| Flax seed         | 709 | 4366 | 1576 | 3042 | 6191 | 55.0  | 10.6 | 50.5 | 0.27  | <0.06 | 26.2 |
| Hemp seed         | 10  | 4365 | 1400 | 5125 | 9685 | 152.0 | 12.6 | 76.5 | 0.48  | 0.74  | 60.2 |
| Sesame seed       | 548 | 2927 | 630  | 2937 | 6475 | 56.3  | 15.4 | 55.5 | <0.25 | 0.81  | 13.0 |
| Black sesame seed | <25 | 2808 | 9247 | 2487 | 5484 | 55.7  | 13.2 | 41.1 | <0.25 | 2.55  | 17.1 |
| LOQ               | 25  | 10   | 25   | 10   | 2.75 | 0.5   | 0.5  | 0.05 | 0.25  | 0.06  | 0.05 |
| Nuts/seeds*       | 0.5 | 1.0  | 0.5  | 0.6  | 0.6  | 0.7   | 1.0  | 0.8  | 3.1   | 0.4   | 1.0  |

LOQ, limit of quantification; \*the ratio of the average value of specific nut parameters to the average value of specific seed parameters

Table S6. Total carbohydrates, fibers, sugars, sucrose, glucose, and fructose content in analyzed samples, reported as g 100 g<sup>-1</sup>

| Sample                 | Total carbohydrates | Total fibers | Total sugar* | Sucrose | Glucose   | Fructose  |
|------------------------|---------------------|--------------|--------------|---------|-----------|-----------|
| Peanut raw             | 14.0±1.1            | 8.5±0.3      | 4.0±0.2      | 3.8±0.2 | 0.10±0.03 | 0.10±0.04 |
| Peanuts roasted        | 16.3±0.8            | 8.4±0.2      | 4.2±0.2      | 4.0±0.1 | 0.10±0.03 | 0.10±0.02 |
| Peanuts boiled         | 17.2±0.8            | 8.7±0.3      | 4.1±0.3      | 3.9±0.2 | 0.10±0.02 | 0.11±0.03 |
| Almond raw             | 20.3±0.6            | 12.2±0.3     | 3.9±0.3      | 3.7±0.3 | 0.10±0.02 | 0.10±0.03 |
| Almond roasted         | 15.4±0.6            | 10.5±0.3     | 4.4±0.3      | 4.3±0.2 | <0.1      | <0.1      |
| Almond boiled          | 16.7±0.9            | 10.4±0.3     | 4.9±0.2      | 4.8±0.1 | <0.1      | <0.1      |
| Hazelnuts raw          | 16.1±0.7            | 9.7±0.2      | 4.3±0.2      | 4.2±0.2 | 0.07±0.02 | 0.07±0.02 |
| Hazelnuts roasted      | 15.9±1.1            | 9.4±0.3      | 4.9±0.1      | 4.8±0.1 | 0.07±0.03 | 0.07±0.03 |
| Walnut                 | 9.7±0.5             | 7.1±0.2      | 1.4±0.1      | 1.3±0.1 | 0.05±0.02 | 0.05±0.02 |
| Brazil nut             | 12.1±0.8            | 7.5±0.4      | 2.3±0.1      | 2.3±0.1 | <0.1      | <0.1      |
| Cashew nut raw         | 28.3±1.6            | 3.3±0.3      | 5.9±0.1      | 5.8±0.1 | 0.05±0.03 | 0.05±0.02 |
| Cashew nut roasted     | 26.2±1.4            | 3.2±0.3      | 5.0±0.2      | 4.8±0.2 | 0.08±0.02 | 0.08±0.02 |
| Pecan nut              | 13.9±0.9            | 9.6±0.6      | 4.0±0.3      | 3.9±0.3 | <0.1      | <0.1      |
| Pine nuts              | 10.8±0.7            | 3.7±0.3      | 3.6±0.1      | 3.5±0.1 | 0.06±0.02 | 0.06±0.02 |
| Pistachios roasted     | 27.4±1.0            | 10.3±0.3     | 7.6±0.3      | 7.0±0.2 | 0.31±0.03 | 0.21±0.07 |
| Sunflower seed raw     | 21.2±0.7            | 8.6±0.4      | 2.6±0.1      | 2.5±0.1 | <0.1      | <0.1      |
| Sunflower seed roasted | 25.5±1.0            | 10.6±0.5     | 3.1±0.2      | 2.9±0.2 | 0.10±0.02 | 0.10±0.03 |
| Pumpkin seed raw       | 12.2±1.6            | 3.9±0.4      | 1.9±0.3      | 1.0±0.1 | 0.40±0.10 | 0.50±0.09 |

|                      |          |          |           |           |           |           |
|----------------------|----------|----------|-----------|-----------|-----------|-----------|
| Pumpkin seed roasted | 12.7±1.1 | 3.9±0.4  | 2.1±0.3   | 1.4±0.2   | 0.31±0.08 | 0.40±0.04 |
| Chia seed            | 41.5±1.3 | 37.7±1.4 | <0.1      | <0.1      | <0.1      | <0.1      |
| Flax seed            | 27.0±1.2 | 25.2±0.8 | 1.7±0.2   | 1.2±0.1   | 0.40±0.06 | 0.10±0.03 |
| Hemp seed            | 6.8±1.1  | 4.0±0.4  | 1.5±0.2   | 0.9±0.1   | 0.23±0.06 | 0.32±0.08 |
| Sesame seed          | 17.6±0.9 | 11.8±0.5 | 0.3±0.1   | 0.2±0.1   | 0.05±0.02 | 0.05±0.03 |
| Black sesame seed    | 10.5±1.2 | 10.0±0.4 | 0.20±0.04 | 0.10±0.02 | 0.05±0.03 | 0.05±0.02 |

\* expressed as the sum of glucose, fructose and sucrose
